# Supplementary material
Source: PubMed Central journal article supplement (PMC6369917)

**SUPPLEMENTAL TABLE 1. CHRONIC UNPREDICTABLE STRESS SCHEDULE**

| DAY | STRESSOR 1                 | STRESSOR 2                 |
|-----|----------------------------|----------------------------|
| 1   | CROWDING                   | LIGHT ON                   |
| 2   | PEPPERMINT ODOR            | COLD EXPOSURE (4°C for 1h) |
| 3   | LIGHT OFF                  | FOOD DEPRIVATION           |
| 4   | CAGE TILTING (45°)         | IMMOBILIZATION (1h)        |
| 5   | WATER DEPRIVATION          | STROBE                     |
| 6   | CAGE ROTATION              | WET BEDDING                |
| 7   | SWIM (10m)                 | ISOLATION                  |
| 8   | PEPPERMINT ODOR            | COLD EXPOSURE (4°C for 1h) |
| 9   | IMMOBILIZATION (1h)        | LIGHT ON                   |
| 10  | WATER DEPRIVATION          | LIGHT OFF                  |
| 11  | CAGE ROTATION              | CROWDING                   |
| 12  | FOOD DEPRIVATION           | WET BEDDING                |
| 13  | SWIM (10m)                 | CAGE TILTING (45°)         |
| 14  | COLD EXPOSURE (4°C for 1h) | ISOLATION                  |
| 15  | PEPPERMINT ODOR            | WATER DEPRIVATION          |
| 16  | LIGHT ON                   | IMMOBILIZATION (1h)        |
| 17  | LIGHT OFF                  | STROBE                     |
| 18  | CAGE TILTING (45°)         | CAGE ROTATION              |
| 19  | CROWDING                   | WET BEDDING                |
| 20  | SWIM (10m)                 | FOOD DEPRIVATION           |
| 21  | LIGHT OFF                  | LIGHT ON                   |
| 22  | CAGE ROTATION              | ISOLATION                  |
| 23  | WATER DEPRIVATION          | IMMOBILIZATION (1h)        |
| 24  | COLD EXPOSURE (4°C for 1h) | CAGE TILTING (45°)         |
| 25  | STROBE                     | WET BEDDING                |
| 26  | SWIM (10m)                 | ISOLATION                  |
| 27  | PEPPERMINT ODOR            | CROWDING                   |
| 28  | COLD EXPOSURE*             | ROTATION*                  |

\*LAST STRESSORS WERE CONSISTENTLY USED IN COMBINATION ON THE LAST STRESS DAY

**SUPPLEMENTAL TABLE 2. STRESS RE-EXPOSURE SCHEDULE**

| DAY | STRESSOR 1                 | STRESSOR 2          |
|-----|----------------------------|---------------------|
| 57  | CROWDING                   | LIGHT ON            |
| 58  | PEPPERMINT ODOR            | FOOD DEPRIVATION    |
| 59  | LIGHT OFF                  | IMMOBILIZATION (1h) |
| 60  | CAGE TILTING (45°)         | STROBE              |
| 61  | WATER DEPRIVATION          | WET BEDDING         |
| 62  | SWIM (10m)                 | ISOLATION           |
| 63  | COLD EXPOSURE (4°C for 1h) | CAGE ROTATION       |

\*\* SHORT TERM UNPREDICTABLE STRESS PARADIGM USED FOR STRESS RE-EXPOSURE FOLLOWING POST STRESS PERIOD

**SUPPLEMENTAL TABLE 3. PRIMER SEQUENCE**

| GENE  | FORWARD                         | REVERSE                            |
|-------|---------------------------------|------------------------------------|
| TLR4  | CCA GAA TGA GGA CTG GGT GAG AAA | CCA CCA CAA TAA CTT TCC GGC TCT TG |
| RAGE  | TGA CCC TGA CCT GTG CCA TC      | CCT CAT CCT CAT GCC CTA CCT C      |
| HMGB1 | CAC TGC TGC GGA TGA CAA GC      | CCT CCT CGT CGT CTT CCT CTT        |
| HMBS  | GGA GGT CCG AGC CAA GGA CCA     | CTG GCA CGC TAC AGC CTC CTT CC     |

**Supplemental Figure 1. CUS results in long lasting microglial reactivity in the hippocampus.** Sprague Dawley rats were stressed for a total of 3 days (US) or 28days (CUS) and sacrificed 4hrs or 28 days (Post Stress) following the last stress exposure. Immunohistochemistry was conducted for the microglial marker IBA1 in the dorsal hippocampal sub-regions of dentate gyrus (DG), CA1 mossy cell layer and CA3 pyramidal cell layer in controls and following CUS. Representative images are shown for each condition and hippocampal subregion.

**Supplemental Figure 2. CUS does not alter hippocampal microglia density in Sprague Dawley rats.** (A) Experimental paradigm. (B-C) Microglial density was determined for the dorsal hippocampal sub regions of dentate gyrus (DG), CA1 mossy cell layer and CA3 pyramidal cell layer following (B) CUS (no effect,  $F(1,18)=0.58$ ,  $p=0.4562$ ) and (C) short term stress re-exposure (no effect,  $F(3,47)=0.0299$ ,  $p=0.9929$ ). The results are expressed as the mean  $\pm$  SEM.  $N=4$  animals per group. Two-way ANOVA followed by performed for CUS and Post stress  $\pm$  US data set.

**Supplemental Figure 3. Reversible effects of CUS on basal corticosterone serum levels and body weight in Sprague Dawley rats.** (A) Basal corticosterone levels during stress exposure and stress recovery (interaction of stress and time,  $F(5,25)=10.13$ ,  $p<0.01$ ). CORT levels were determined from tail blood samples collected at 9:00 am at each time point. (B) Body weight during stress exposure and stress recovery (interaction of stress and time,  $F(6,66)=24.41$ ;  $p<0.01$ ). Two-way ANOVA repeated measures followed by Bonferroni post hoc test performed for each time point.

**Supplemental Figure 4. CUS increases nuclear export of HMGB1 in the hippocampus.** (A) Experimental paradigm of CUS and post stress period in Sprague Dawley rats. Nuclear and cytoplasmic HMGB1 levels in total lysates prepared from hippocampal tissue collected (B) 4hrs (interaction of stress and localization,  $F(1,16)=6.346$ ,  $p=0.0228$ ) (C) 28 days after the last CUS stressor (interaction of prior stress and localization,  $F(1,23)=12.5$ ,  $p=0.0018$ ). The results are expressed as the mean  $\pm$  SEM.  $N=5-8$  animals per group.  $*p<0.01$ . Two-way ANOVA was performed for CUS and post stress group.

**Supplemental Figure 5. Acute stress re-exposure is insufficient to reinstate anhedonic behavior in post stress animals.** (A) Hypothalamic-pituitary-adrenal (HPA) response in post stress animals during and after acute (2h) restraint stress re-exposure (main effect of time,  $F(5,52)=21.09$ ,  $p<0.0001$ , no effect of stress  $F(5,52)=3.345$ ,  $p=0.0724$ ). Corticosterone levels were determined from tail blood samples collected immediately prior (at basal; B), during (15, 30, 60 and 120 minutes during restraint min; 15R, 30R, 60R and 120R respectively) and post acute immobilization (60 minutes post restraint; 60P). (B) Post stress rats were tested for sucrose preference 4h and 24h following acute (2h) restraint re exposure (no effect,  $F(1,20)=0.0077$ ,  $p=0.9306$ ). The results are expressed as the mean  $\pm$  SEM.  $N=10-12$  animals per group. Two-way ANOVA repeated measures performed for corticosterone and sucrose preference test.

**Supplemental Figure 6. Previous CUS exposure alters Inflammasome signaling in rats.** (A) Paradigm for CUS plus post stress re-exposure to unpredictable stress. Levels of IL1 $\beta$  and NLRP3 were quantified in enriched microglia or total lysates prepared from hippocampal tissue collected 4hrs after the last stressor. (B-C) mRNA levels were determined in enriched hippocampal microglia by PCR analysis; (B) IL1 $\beta$  (no effect,  $F(1,30)=2.011$ ,  $p=0.1665$ ) and (c) NLRP3 (main effect of stress,  $F(1,31)=4.916$ ,  $p=0.0341$ ; no interaction of stress and prior exposure  $F(1,31)=4.916$ ,  $p=0.0341$ ). (D-E) mRNA in total hippocampal lysates by PCR analysis; (D) IL1 $\beta$  (no effect,  $F(1,20)=0.7788$ ,  $p=0.3880$ ) and (E) NLRP3 (main effect of stress,  $F(1,20)=5.228$ ,  $p=0.0333$ ; no interaction,  $F(1,20)=0.0083$ ,  $p=0.9280$ ). (F-G) Protein levels determined by western blot analysis; (F) IL1 $\beta$  (significant interaction of stress and prior exposure,  $F(1,19)=4.415$ ,  $p=0.0492$ ) and (G) NLRP3 (no effect,  $F(1,24)=0.9043$ ,  $p=0.3511$ ) protein in total hippocampal lysates by western blot analysis. All genes were normalized to housekeeping gene HMBS. IL1 $\beta$  and NLRP3 levels were normalized to  $\beta$ -actin. The results are expressed as the mean  $\pm$  SEM.  $N=6-10$  animals per group.  $\#p\leq 0.1$ . Two-way ANOVA was performed for each gene and protein followed by Bonferroni post hoc test for data sets with significant interaction.

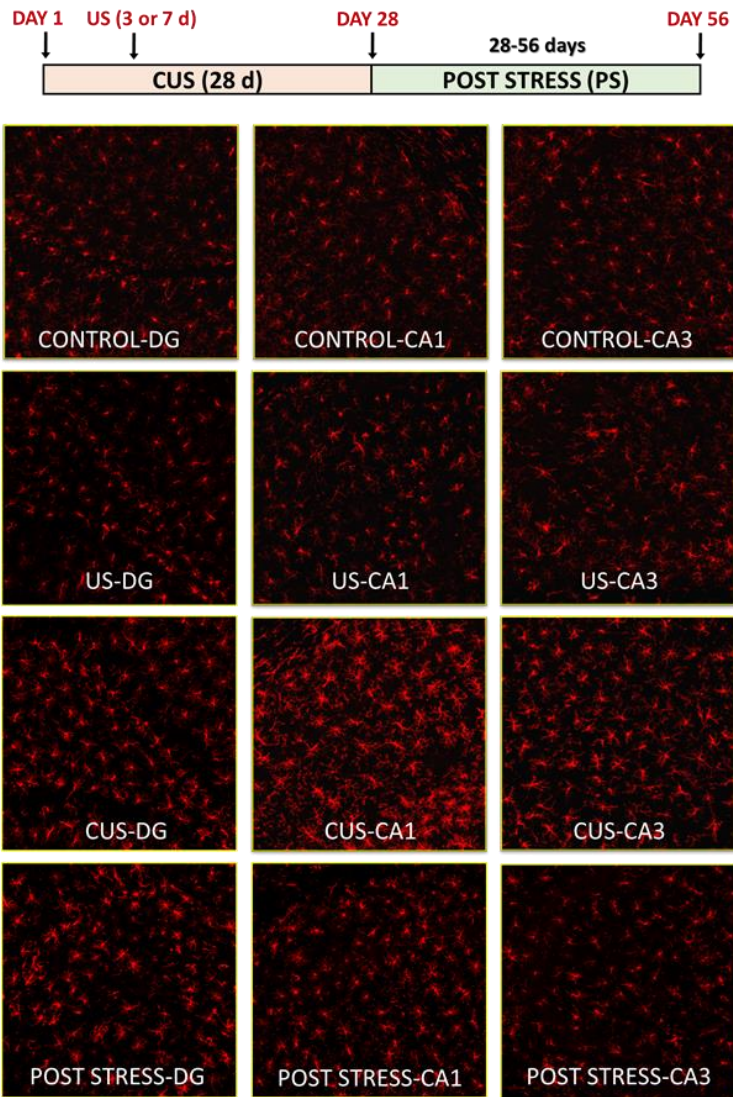

**FIGURE S1**

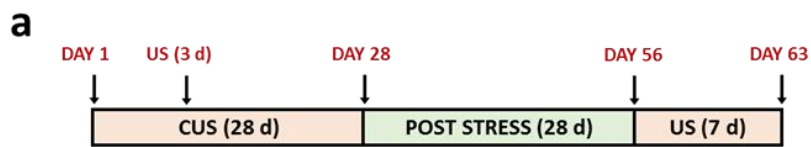

**FIGURE S2**

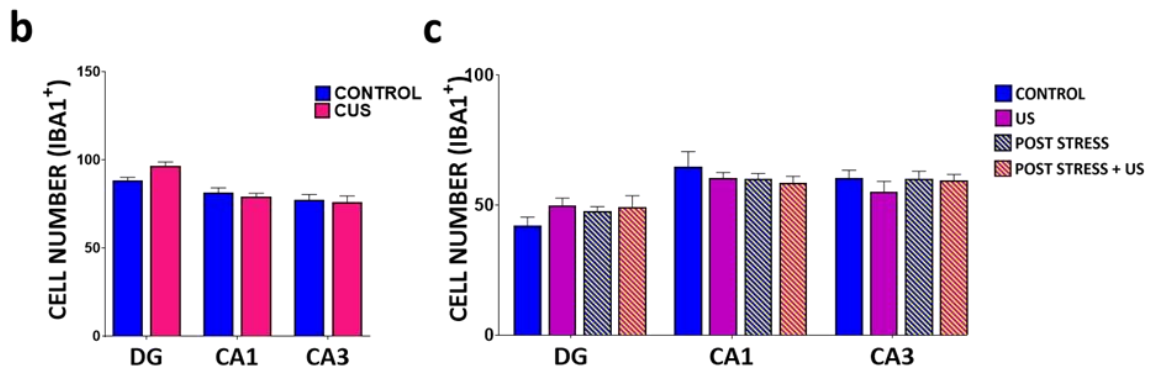

FIGURE S3

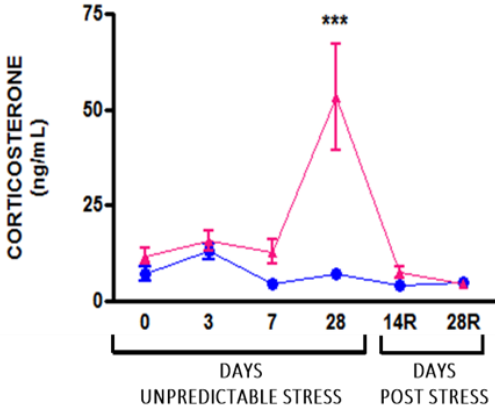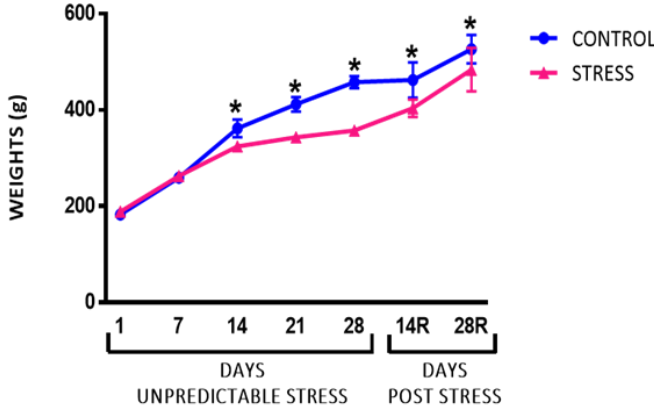

**FIGURE S4**

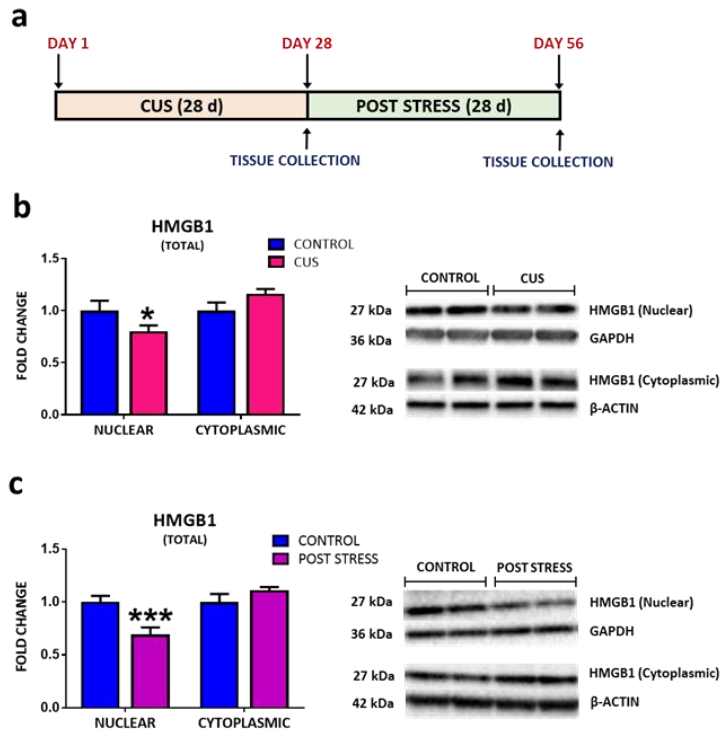

**FIGURE S5**

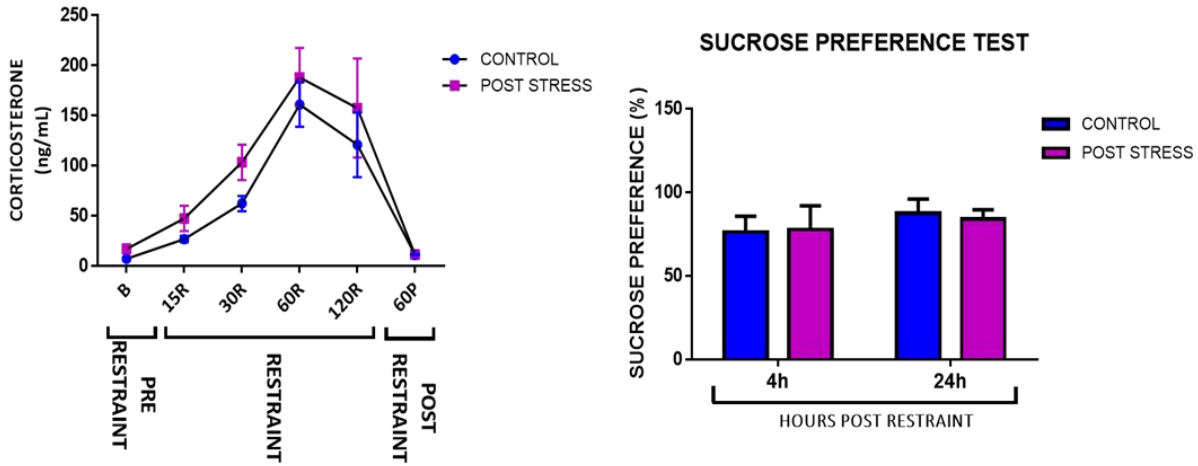

**FIGURE S6**

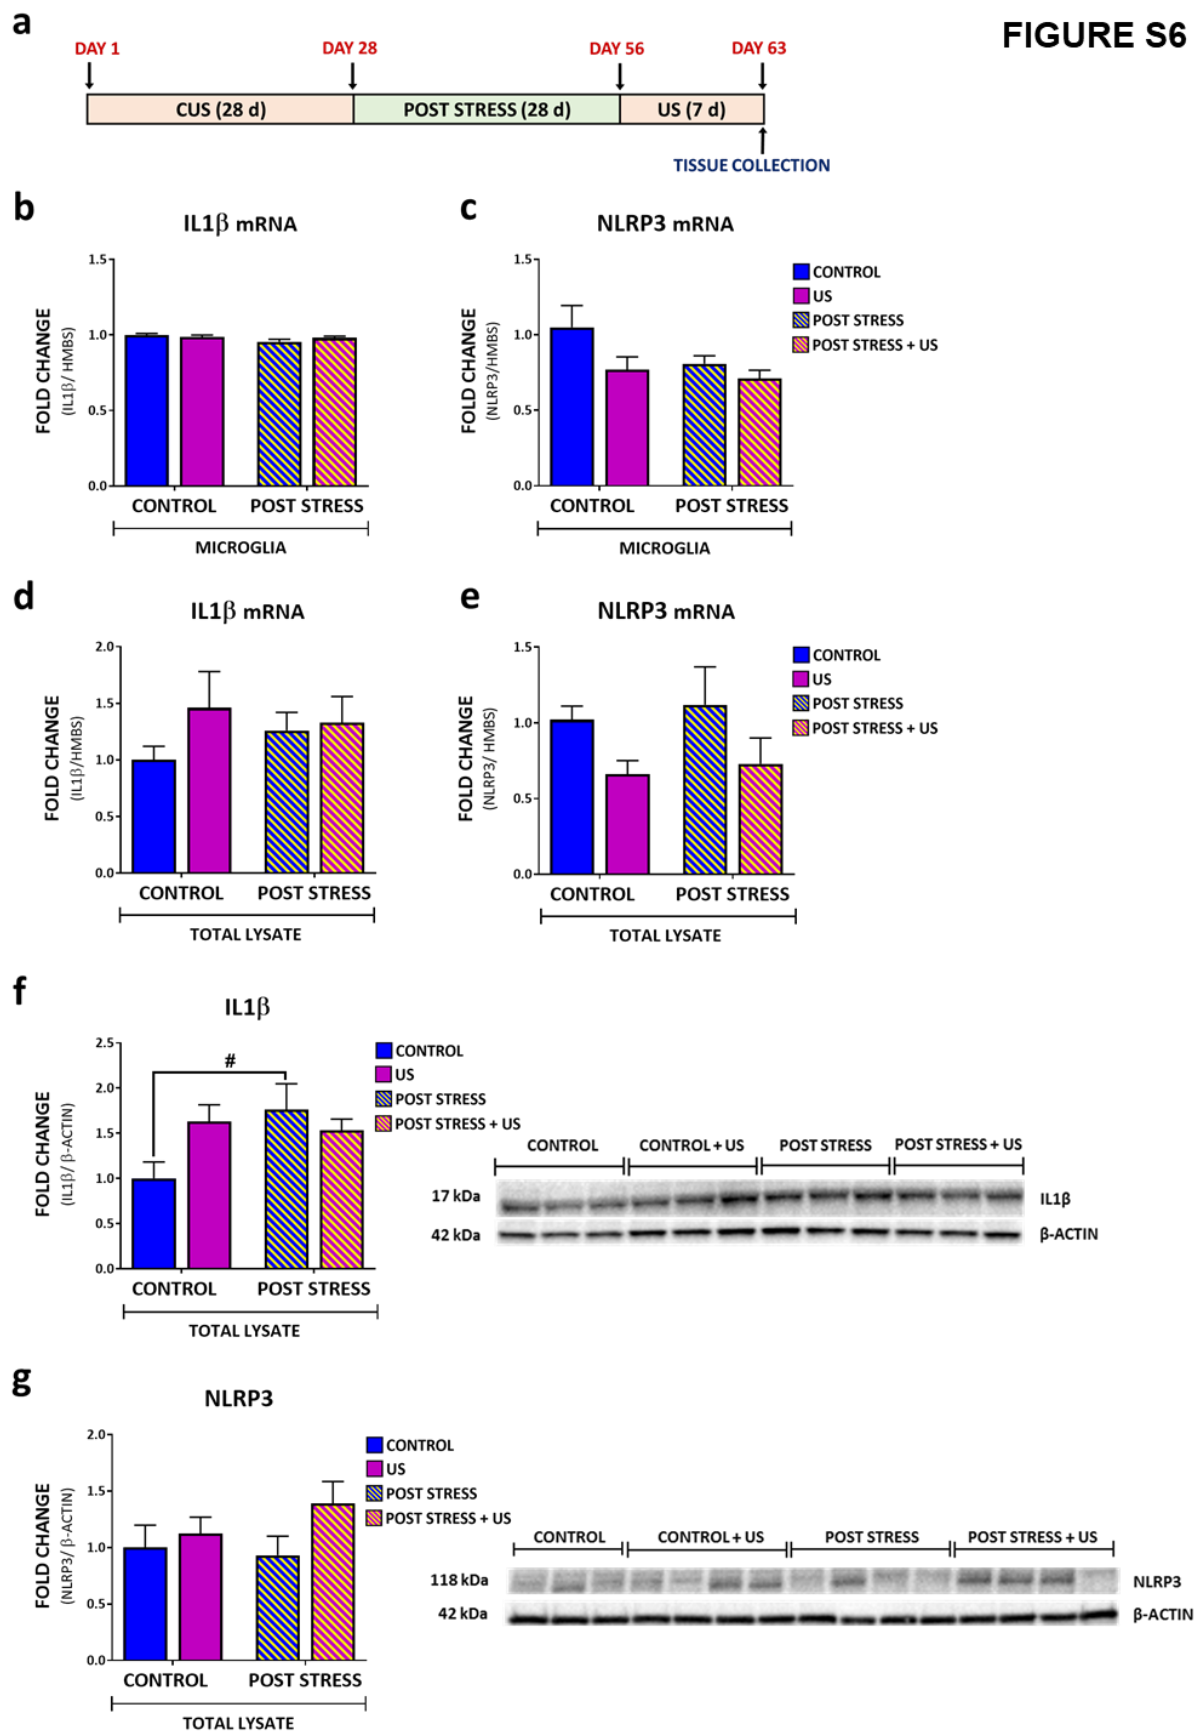

Supplement: NIHMS1009583-supplement-Supplemental.pdf [file NIHMS1009583-supplement-Supplemental.pdf]
